# Supplementary material
Source: PubMed Central journal article supplement (PMC3055727)

**Ai.**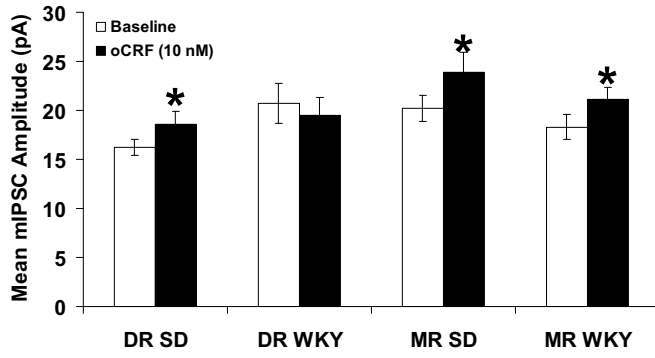**Aii.**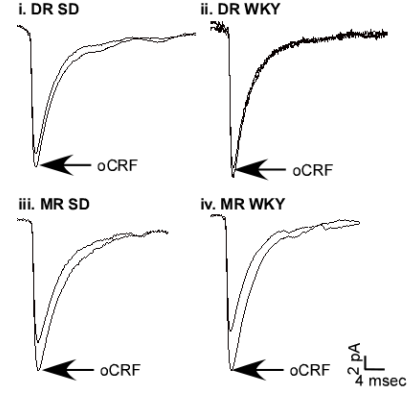**Bi.**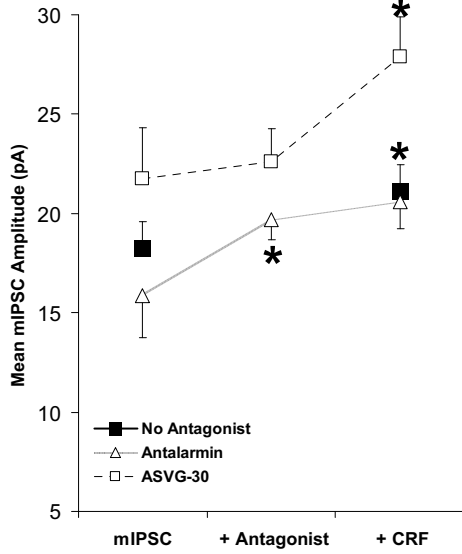**Bii.**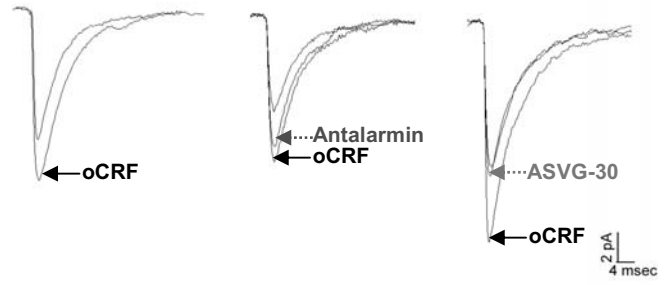

Supplement: npp2010200x2.pdf [file npp2010200x2.pdf]
